# Supplementary material for: Theoretical study of catalytic oxidation of CO on free PdxO2+(x = 4–6) clusters: size dependent comparison of combustion
Source: Royal Society of Chemistry journal article supplement (doi:10.1039/c5ra04700e), 2015-01-01
Supplement: c5ra04700e1.pdf [file c5ra04700e1.pdf]

## Electronic Supplementary Information:

### Theoretical Study of Catalytic Oxidation of CO on free $Pd_xO_2^+$ (x = 4-6) Clusters: Size Dependent Comparison of Combustion

Chandan Sahu, Deepanwita Ghosh and Abhijit K. Das\*

*Department of Spectroscopy, Indian Association for the Cultivation of Science, Jadavpur,  
Kolkata 700032, India*

| Sl. No. | Contents                                                                                                                                                                                                                                                                                                                |
|---------|-------------------------------------------------------------------------------------------------------------------------------------------------------------------------------------------------------------------------------------------------------------------------------------------------------------------------|
| 1.      | <b>Figure S1</b> Gas phase optimized geometries of the most stable conformer of $Pd_4^+$ , $Pd_5^+$ , and $Pd_6^+$ at M06-L/GENECP.                                                                                                                                                                                     |
| 2.      | <b>Table S1</b> Relative Energies ( $\Delta E$ , kcal/mol), enthalpies ( $\Delta H$ , kcal/mol), and free energies ( $\Delta G$ , kcal/mol) of all optimized stationary points involved in $O_2$ dissociation on $Pd_4^+$ cluster for generation of $Pd_4O_2^+$ in gas-phase, optimized at M06L/GENECP level of theory. |
| 3.      | <b>Table S2</b> Relative Energies ( $\Delta E$ , kcal/mol), enthalpies ( $\Delta H$ , kcal/mol), and free energies ( $\Delta G$ , kcal/mol) of all optimized stationary points involved in $O_2$ dissociation on $Pd_5^+$ cluster for generation of $Pd_5O_2^+$ in gas-phase, optimized at M06L/GENECP level of theory. |
| 4.      | <b>Table S3</b> Relative Energies ( $\Delta E$ , kcal/mol), enthalpies ( $\Delta H$ , kcal/mol), and free energies ( $\Delta G$ , kcal/mol) of all optimized stationary points involved in $O_2$ dissociation on $Pd_6^+$ cluster for generation of $Pd_6O_2^+$ in gas-phase, optimized at M06L/GENECP level of theory. |
| 5.      | <b>Table S4</b> Relative Energies ( $\Delta E$ , kcal/mol), enthalpies ( $\Delta H$ , kcal/mol), and free energies ( $\Delta G$ , kcal/mol) of all optimized stationary points involved in the combustion reaction of CO in gas-phase on $Pd_4O_2^+$ cluster, optimized at M06L/GENECP level of theory.                 |

6. **Table S5** Relative Energies ( $\Delta E$ , kcal/mol), enthalpies ( $\Delta H$ , kcal/mol), and free energies ( $\Delta G$ , kcal/mol) of all optimized stationary points involved in the combustion reaction of CO in gas-phase on  $Pd_5^+2O^+$  cluster, optimized at M06L/GENECP level of theory.
7. **Table S6** Relative Energies ( $\Delta E$ , kcal/mol), enthalpies ( $\Delta H$ , kcal/mol), and free energies ( $\Delta G$ , kcal/mol) of all optimized stationary points involved in the combustion reaction of CO in gas-phase on  $Pd_6^+2O^+$  cluster, optimized at M06L/GENECP level of theory.
8. Cartesian coordinates of all geometries, optimized at M06L/GENECP level of theory.
9. CO Oxidation Promoted by  $Pd_6O_4^+$  clusters:
10. **Table S7** Average bond lengths ( $\text{\AA}$ ) of the most stable clusters as a function of cluster size.
11. **Table S8** Theoretical and experimental results of bond length R ( $\text{\AA}$ ), binding energy BE (eV) for Pd-O system.

1. **Figure S1** Gas phase optimized geometries of the most stable conformer of  $Pd_4^+$ ,  $Pd_5^+$ , and  $Pd_6^+$  at M06-L/GENECP.

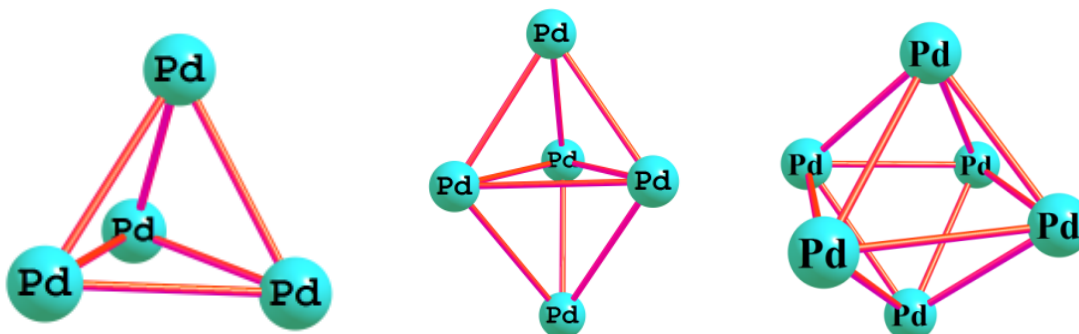

2. **Table S1** Relative Energies ( $\Delta E$ , kcal/mol), enthalpies ( $\Delta H$ , kcal/mol), and free energies ( $\Delta G$ , kcal/mol) of all optimized stationary points involved in  $O_2$  dissociation on  $Pd_4^+$  cluster for generation of  $Pd_4^+2O^+$  in gas-phase, optimized at M06L/GENECP level of theory.

| Species               | $\Delta E$ | $\Delta H$ | $\Delta G$ |
|-----------------------|------------|------------|------------|
| R1 ( $O_2^+ Pd_4^+$ ) | 0.00       | 0.00       | 0.00       |
| IM1                   | -41.33     | -41.33     | -33.61     |
| TS <sub>1-2</sub>     | -32.50     | -32.93     | -23.99     |
| IM2                   | -64.57     | -65.02     | -55.89     |
| TS <sub>2-3</sub>     | -61.95     | -62.64     | -52.94     |
| IM3                   | -62.62     | -62.71     | -54.26     |
| TS <sub>3-4</sub>     | -62.16     | -62.87     | -52.99     |
| IM4                   | -67.20     | -67.53     | -58.54     |

3. **Table S2** Relative Energies ( $\Delta E$ , kcal/mol), enthalpies ( $\Delta H$ , kcal/mol), and free energies ( $\Delta G$ , kcal/mol) of all optimized stationary points involved in  $O_2$  dissociation on  $Pd_5^+$  cluster for generation of  $Pd_5^+2O^+$  in gas-phase, optimized at M06L/GENECP level of theory.

| Species               | $\Delta E$ | $\Delta H$ | $\Delta G$ |
|-----------------------|------------|------------|------------|
| R2 ( $O_2 + Pd_5^+$ ) | 0.00       | 0.00       | 0.00       |
| IM5                   | -42.53     | -42.72     | -33.51     |
| TS <sub>5-6</sub>     | -41.34     | -41.95     | -31.31     |
| IM6                   | -49.41     | -49.85     | -39.91     |
| TS <sub>6-7</sub>     | -46.81     | -47.51     | -37.22     |
| IM7                   | -67.34     | -67.69     | -58.39     |

**4. Table S3** Relative Energies ( $\Delta E$ , kcal/mol), enthalpies ( $\Delta H$ , kcal/mol), and free energies ( $\Delta G$ , kcal/mol) of all optimized stationary points involved in  $O_2$  dissociation on  $Pd_6^+$  cluster for generation of  $Pd_6O^+$  in gas-phase, optimized at M06L/GENECP level of theory.

| Species               | $\Delta E$ | $\Delta H$ | $\Delta G$ |
|-----------------------|------------|------------|------------|
| R3 ( $O_2 + Pd_6^+$ ) | 0.00       | 0.00       | 0.00       |
| IM8                   | -59.93     | -60.55     | -49.46     |
| TS <sub>8-9</sub>     | -20.01     | -20.73     | -9.54      |
| IM9                   | -67.28     | -67.82     | -57.41     |

**5. Table S4** Relative Energies ( $\Delta E$ , kcal/mol), enthalpies ( $\Delta H$ , kcal/mol), and free energies ( $\Delta G$ , kcal/mol) of all optimized stationary points involved in the combustion reaction of CO in gas-phase on  $Pd_4O^+$  cluster, optimized at M06L/GENECP level of theory.

| Species             | $\Delta E$ | $\Delta H$ | $\Delta G$ |
|---------------------|------------|------------|------------|
| IM4 + 2CO           | 0.00       | 0.00       | 0.00       |
| IM10                | -22.15     | -22.53     | -12.71     |
| TS <sub>10-11</sub> | -6.30      | -7.11      | 3.67       |

|                                                       |         |         |         |
|-------------------------------------------------------|---------|---------|---------|
| IM11                                                  | -78.33  | -78.71  | -70.21  |
| IM12                                                  | -65.60  | -66.23  | -65.93  |
| IM13                                                  | -89.88  | -90.66  | -81.14  |
| TS <sub>13-14</sub>                                   | -69.45  | -70.58  | -59.94  |
| IM14                                                  | -134.20 | -135.02 | -126.98 |
| P1 (2CO <sub>2</sub> + Pd <sub>4</sub> <sup>+</sup> ) | -125.55 | -126.96 | -124.28 |

---

**6. Table S5** Relative Energies ( $\Delta E$ , kcal/mol), enthalpies ( $\Delta H$ , kcal/mol), and free energies ( $\Delta G$ , kcal/mol) of all optimized stationary points involved in the combustion reaction of CO in gas-phase on Pd<sub>5</sub>2O<sup>+</sup> cluster, optimized at M06L/GENECP level of theory.

| Species                                               | $\Delta E$ | $\Delta H$ | $\Delta G$ |
|-------------------------------------------------------|------------|------------|------------|
| IM7+ 2CO                                              | 0.00       | 0.00       | 0.00       |
| IM15                                                  | -21.50     | -22.01     | -11.12     |
| TS <sub>15-16</sub>                                   | -8.19      | -9.15      | 3.03       |
| IM16                                                  | -76.12     | -76.55     | -67.39     |
| IM17                                                  | -64.31     | -64.95     | -63.96     |
| IM18                                                  | -108.04    | -109.19    | -97.36     |
| TS <sub>18-19</sub>                                   | -99.05     | -100.64    | -87.56     |
| IM19                                                  | -100.24    | -101.38    | -89.45     |
| TS <sub>19-20</sub>                                   | -80.97     | -82.48     | -69.53     |
| IM20                                                  | -130.63    | -131.44    | -123.45    |
| P2 (2CO <sub>2</sub> + Pd <sub>5</sub> <sup>+</sup> ) | -125.41    | -126.80    | -124.43    |

---

**7. Table S6** Relative Energies ( $\Delta E$ , kcal/mol), enthalpies ( $\Delta H$ , kcal/mol), and free energies ( $\Delta G$ , kcal/mol) of all optimized stationary points involved in the combustion reaction of CO in gas-phase on  $Pd_6^{2O^+}$  cluster, optimized at M06L/GENECP level of theory.

| Species                                               | $\Delta E$ | $\Delta H$ | $\Delta G$ |
|-------------------------------------------------------|------------|------------|------------|
| IM9 + 2CO                                             | 0.00       | 0.00       | 0.00       |
| IM21                                                  | -25.86     | -26.13     | -16.58     |
| TS <sub>21-22</sub>                                   | -4.10      | -4.86      | 6.33       |
| IM22                                                  | -70.21     | -70.42     | -62.20     |
| IM23                                                  | -59.65     | -60.28     | -59.31     |
| IM24                                                  | -98.09     | -99.16     | -88.46     |
| TS <sub>24-25</sub>                                   | -55.60     | -56.79     | -45.53     |
| IM25                                                  | -132.25    | -133.10    | -123.40    |
| P3 (2CO <sub>2</sub> + Pd <sub>6</sub> <sup>+</sup> ) | -125.46    | -126.66    | -125.41    |

**8.** Cartesian coordinates of all geometries, optimized at M06L/GENECP level of theory.

**IM1**

Standard orientation:

| Center Number | Atomic Number | Atomic Type | Coordinates (Angstroms) |           |           |
|---------------|---------------|-------------|-------------------------|-----------|-----------|
|               |               |             | X                       | Y         | Z         |
| 1             | 46            | 0           | 1.684871                | 0.211952  | -0.815681 |
| 2             | 46            | 0           | -1.848939               | -0.020779 | -0.580103 |
| 3             | 46            | 0           | -0.084877               | 1.493449  | 0.715512  |
| 4             | 8             | 0           | -0.424967               | -1.695440 | -0.775591 |
| 5             | 8             | 0           | 0.109350                | -0.833150 | -1.699327 |
| 6             | 46            | 0           | 0.303835                | -1.244867 | 1.110693  |

**TS<sub>1-2</sub>**

Standard orientation:

| Center | Atomic | Atomic | Coordinates (Angstroms) |  |  |
|--------|--------|--------|-------------------------|--|--|
|--------|--------|--------|-------------------------|--|--|

| Number | Number | Type | X         | Y         | Z         |
|--------|--------|------|-----------|-----------|-----------|
| 1      | 46     | 0    | 1.159893  | 1.428597  | -0.297303 |
| 2      | 46     | 0    | -1.992828 | -0.001636 | -0.440035 |
| 3      | 46     | 0    | -0.221005 | -0.004542 | 1.533686  |
| 4      | 8      | 0    | -0.323842 | -0.899407 | -1.419236 |
| 5      | 8      | 0    | -0.327243 | 0.901491  | -1.417234 |
| 6      | 46     | 0    | 1.167172  | -1.422782 | -0.303049 |

### IM2

Standard orientation:

| Center Number | Atomic Number | Atomic Type | Coordinates (Angstroms) |           |           |
|---------------|---------------|-------------|-------------------------|-----------|-----------|
|               |               |             | X                       | Y         | Z         |
| 1             | 46            | 0           | 1.036647                | 1.376706  | -0.639947 |
| 2             | 46            | 0           | -2.062672               | -0.004818 | -0.478603 |
| 3             | 46            | 0           | 0.234430                | 0.003784  | 1.678597  |
| 4             | 8             | 0           | -0.725586               | -1.320038 | 0.214418  |
| 5             | 8             | 0           | -0.731300               | 1.317247  | 0.213849  |
| 6             | 46            | 0           | 1.044967                | -1.375187 | -0.634528 |

### TS<sub>2,3</sub>

Standard orientation:

| Center Number | Atomic Number | Atomic Type | Coordinates (Angstroms) |           |           |
|---------------|---------------|-------------|-------------------------|-----------|-----------|
|               |               |             | X                       | Y         | Z         |
| 1             | 46            | 0           | 1.240328                | 1.361988  | -0.265764 |
| 2             | 46            | 0           | -1.601905               | 0.001192  | -1.037054 |
| 3             | 46            | 0           | -0.633815               | -0.002364 | 1.545838  |
| 4             | 8             | 0           | -0.706563               | -1.483414 | 0.071776  |
| 5             | 8             | 0           | -0.707384               | 1.481979  | 0.076355  |
| 6             | 46            | 0           | 1.241296                | -1.360567 | -0.268782 |

### IM3

Standard orientation:

| Center Number | Atomic Number | Atomic Type | Coordinates (Angstroms) |           |           |
|---------------|---------------|-------------|-------------------------|-----------|-----------|
|               |               |             | X                       | Y         | Z         |
| 1             | 46            | 0           | 1.218183                | 1.307924  | -0.268718 |
| 2             | 46            | 0           | 0.451171                | -0.944995 | 1.315317  |
| 3             | 46            | 0           | -0.197906               | -1.044313 | -1.305686 |
| 4             | 8             | 0           | -1.479393               | -1.013802 | 0.249685  |
| 5             | 8             | 0           | 1.685935                | -0.615067 | -0.243380 |
| 6             | 46            | 0           | -1.507368               | 0.964666  | 0.257991  |

### TS<sub>3,4</sub>

Standard orientation:

| Center<br>Number | Atomic<br>Number | Atomic<br>Type | Coordinates (Angstroms) |           |           |
|------------------|------------------|----------------|-------------------------|-----------|-----------|
|                  |                  |                | X                       | Y         | Z         |
| 1                | 46               | 0              | -1.331716               | 1.200976  | 0.128225  |
| 2                | 46               | 0              | -0.265699               | -1.091315 | -1.240160 |
| 3                | 46               | 0              | 0.182000                | -0.862621 | 1.423432  |
| 4                | 8                | 0              | 1.547968                | -0.924424 | -0.064158 |
| 5                | 8                | 0              | -1.801389               | -0.673036 | -0.066650 |
| 6                | 46               | 0              | 1.459488                | 1.030778  | -0.288748 |

### IM4

Standard orientation:

| Center<br>Number | Atomic<br>Number | Atomic<br>Type | Coordinates (Angstroms) |           |          |
|------------------|------------------|----------------|-------------------------|-----------|----------|
|                  |                  |                | X                       | Y         | Z        |
| 1                | 46               | 0              | 0.126616                | 0.082989  | 0.020842 |
| 2                | 46               | 0              | -0.112425               | 0.042935  | 2.741416 |
| 3                | 46               | 0              | 2.448367                | -0.256271 | 1.800500 |
| 4                | 8                | 0              | 1.400104                | -1.319403 | 3.149707 |
| 5                | 8                | 0              | -1.047604               | 0.956686  | 1.334069 |
| 6                | 46               | 0              | 0.631648                | -2.330199 | 1.587342 |

### IM5

Standard orientation:

| Center<br>Number | Atomic<br>Number | Atomic<br>Type | Coordinates (Angstroms) |           |           |
|------------------|------------------|----------------|-------------------------|-----------|-----------|
|                  |                  |                | X                       | Y         | Z         |
| 1                | 46               | 0              | 0.521488                | -1.846568 | -0.381198 |
| 2                | 46               | 0              | -0.043126               | -0.189083 | 1.631010  |
| 3                | 46               | 0              | 1.943040                | 0.494365  | -0.189164 |
| 4                | 46               | 0              | -1.952740               | -0.418864 | -0.282456 |
| 5                | 46               | 0              | -0.470521               | 1.900471  | -0.172964 |
| 6                | 8                | 0              | -0.333457               | -0.424088 | -1.799168 |
| 7                | 8                | 0              | 0.344145                | 0.767246  | -1.680897 |

### TS<sub>5-6</sub>

Standard orientation:

| Center<br>Number | Atomic<br>Number | Atomic<br>Type | Coordinates (Angstroms) |           |           |
|------------------|------------------|----------------|-------------------------|-----------|-----------|
|                  |                  |                | X                       | Y         | Z         |
| 1                | 46               | 0              | -1.168417               | 1.609598  | -0.274385 |
| 2                | 46               | 0              | 0.001089                | -0.000065 | 1.646845  |



|   |    |   |           |           |           |
|---|----|---|-----------|-----------|-----------|
| 3 | 46 | 0 | -1.657393 | -1.121496 | -0.271708 |
| 4 | 46 | 0 | 1.656802  | 1.121568  | -0.272675 |
| 5 | 46 | 0 | 1.168211  | -1.609557 | -0.275125 |
| 6 | 8  | 0 | 0.152619  | 0.824362  | -1.589886 |
| 7 | 8  | 0 | -0.154297 | -0.824634 | -1.589590 |

### IM6

Standard orientation:

| Center<br>Number | Atomic<br>Number | Atomic<br>Type | Coordinates (Angstroms) |           |           |
|------------------|------------------|----------------|-------------------------|-----------|-----------|
|                  |                  |                | X                       | Y         | Z         |
| 1                | 46               | 0              | -1.633133               | 1.340629  | -0.272086 |
| 2                | 46               | 0              | 0.000067                | -0.000268 | 1.524958  |
| 3                | 46               | 0              | -1.635047               | -1.338826 | -0.272037 |
| 4                | 46               | 0              | 1.634969                | 1.338972  | -0.271908 |
| 5                | 46               | 0              | 1.633152                | -1.340503 | -0.272292 |
| 6                | 8                | 0              | 0.000989                | 1.274811  | -1.255264 |
| 7                | 8                | 0              | -0.001034               | -1.274841 | -1.255388 |

### TS<sub>6-7</sub>

Standard orientation:

| Center<br>Number | Atomic<br>Number | Atomic<br>Type | Coordinates (Angstroms) |           |           |
|------------------|------------------|----------------|-------------------------|-----------|-----------|
|                  |                  |                | X                       | Y         | Z         |
| 1                | 46               | 0              | -0.105992               | 1.874236  | -0.258108 |
| 2                | 46               | 0              | -0.120618               | -0.113077 | 1.650384  |
| 3                | 46               | 0              | -2.110471               | -0.020721 | -0.305848 |
| 4                | 46               | 0              | 2.091242                | 0.025872  | -0.144704 |
| 5                | 46               | 0              | 0.159725                | -1.859618 | -0.421853 |
| 6                | 8                | 0              | 1.314034                | 1.241744  | -1.427427 |
| 7                | 8                | 0              | -0.818871               | -0.705232 | -1.561830 |

### IM7

Standard orientation:

| Center<br>Number | Atomic<br>Number | Atomic<br>Type | Coordinates (Angstroms) |   |   |
|------------------|------------------|----------------|-------------------------|---|---|
|                  |                  |                | X                       | Y | Z |

|   |    |   |           |           |           |
|---|----|---|-----------|-----------|-----------|
| 1 | 46 | 0 | 0.033924  | 0.757929  | 0.018096  |
| 2 | 46 | 0 | 0.054306  | 0.210502  | 2.785943  |
| 3 | 46 | 0 | 2.198981  | -0.448614 | 1.297143  |
| 4 | 46 | 0 | -1.999184 | 1.672984  | 1.603868  |
| 5 | 46 | 0 | 0.844813  | 2.618069  | 1.884994  |
| 6 | 8  | 0 | -1.870765 | 0.661452  | -0.050493 |
| 7 | 8  | 0 | 1.866017  | 1.408193  | 0.631431  |

### IM8

Standard orientation:

| Center<br>Number | Atomic<br>Number | Atomic<br>Type | Coordinates (Angstroms) |           |           |
|------------------|------------------|----------------|-------------------------|-----------|-----------|
|                  |                  |                | X                       | Y         | Z         |
| 1                | 46               | 0              | -0.253268               | -1.929684 | -0.062223 |
| 2                | 46               | 0              | 1.088633                | -0.012526 | 1.354692  |
| 3                | 46               | 0              | -1.604486               | -0.010636 | 1.276627  |
| 4                | 8                | 0              | 3.241626                | -0.001655 | -0.421587 |
| 5                | 8                | 0              | 3.132653                | -0.012712 | 0.848121  |
| 6                | 46               | 0              | 1.321882                | 0.010347  | -1.231733 |
| 7                | 46               | 0              | -0.247730               | 1.931153  | -0.028937 |
| 8                | 46               | 0              | -1.413601               | 0.013845  | -1.382607 |

### TS<sub>8,9</sub>

Standard orientation:

| Center<br>Number | Atomic<br>Number | Atomic<br>Type | Coordinates (Angstroms) |           |           |
|------------------|------------------|----------------|-------------------------|-----------|-----------|
|                  |                  |                | X                       | Y         | Z         |
| 1                | 46               | 0              | 0.465503                | -0.582188 | 1.646100  |
| 2                | 46               | 0              | 1.620230                | 1.208101  | -0.323390 |
| 3                | 46               | 0              | -0.970655               | 1.565351  | 0.745442  |
| 4                | 8                | 0              | 2.424757                | -0.853755 | -0.515710 |
| 5                | 8                | 0              | 2.276090                | -0.103771 | 1.167556  |
| 6                | 46               | 0              | 0.642469                | -1.671611 | -0.751625 |
| 7                | 46               | 0              | -0.699122               | 0.548614  | -1.667984 |
| 8                | 46               | 0              | -1.875964               | -0.901740 | 0.238093  |

### IM9

Standard orientation:

| Center | Atomic | Atomic | Coordinates (Angstroms) |  |  |
|--------|--------|--------|-------------------------|--|--|
|--------|--------|--------|-------------------------|--|--|

| Number | Number | Type | X         | Y         | Z         |
|--------|--------|------|-----------|-----------|-----------|
| 1      | 46     | 0    | -1.537908 | 1.421813  | 0.080115  |
| 2      | 46     | 0    | 0.001787  | 0.000420  | -1.726867 |
| 3      | 46     | 0    | -1.538707 | -1.421823 | 0.078585  |
| 4      | 8      | 0    | 1.963517  | 0.000408  | -1.321373 |
| 5      | 8      | 0    | -1.960292 | 0.000755  | -1.322597 |
| 6      | 46     | 0    | 1.537980  | 1.420171  | 0.082610  |
| 7      | 46     | 0    | 1.539318  | -1.419613 | 0.081940  |
| 8      | 46     | 0    | -0.003031 | -0.001170 | 1.863438  |

### IM10

Standard orientation:

| Center Number | Atomic Number | Atomic Type | Coordinates (Angstroms) |           |           |
|---------------|---------------|-------------|-------------------------|-----------|-----------|
|               |               |             | X                       | Y         | Z         |
| 1             | 46            | 0           | 0.004056                | -0.006719 | -0.003442 |
| 2             | 46            | 0           | -0.009190               | 0.000517  | 2.664972  |
| 3             | 46            | 0           | 2.553703                | -0.019293 | 1.453555  |
| 4             | 8             | 0           | 1.749691                | -0.959779 | 3.076314  |
| 5             | 8             | 0           | -0.973899               | 1.006379  | 1.336109  |
| 6             | 46            | 0           | 1.114190                | -2.335070 | 1.692163  |
| 7             | 6             | 0           | -0.852750               | 0.658445  | -1.678845 |
| 8             | 8             | 0           | -1.388625               | 1.111198  | -2.575106 |

### TS<sub>10-11</sub>

Standard orientation:

| Center Number | Atomic Number | Atomic Type | Coordinates (Angstroms) |           |           |
|---------------|---------------|-------------|-------------------------|-----------|-----------|
|               |               |             | X                       | Y         | Z         |
| 1             | 46            | 0           | 0.151576                | 0.194844  | 0.016887  |
| 2             | 46            | 0           | 0.102922                | 0.044336  | 2.850260  |
| 3             | 46            | 0           | 2.641348                | -0.153724 | 1.565943  |
| 4             | 8             | 0           | 1.607119                | -1.351785 | 2.814538  |
| 5             | 8             | 0           | -1.226709               | 0.618308  | 1.391481  |
| 6             | 46            | 0           | 0.795142                | -2.256855 | 1.201765  |
| 7             | 6             | 0           | -1.214142               | 1.584100  | -0.216383 |
| 8             | 8             | 0           | -1.974881               | 2.395123  | -0.495105 |

### IM11

Standard orientation:

| Center Number | Atomic Number | Atomic Type | Coordinates (Angstroms) |   |   |
|---------------|---------------|-------------|-------------------------|---|---|
|               |               |             | X                       | Y | Z |

|   |    |   |           |           |           |
|---|----|---|-----------|-----------|-----------|
| 1 | 46 | 0 | 0.377438  | -0.507629 | -0.195826 |
| 2 | 46 | 0 | 0.006448  | -0.077230 | 2.489870  |
| 3 | 46 | 0 | 2.621963  | -0.120584 | 1.200433  |
| 4 | 8  | 0 | 1.710350  | -1.014716 | 2.801162  |
| 5 | 8  | 0 | -1.890310 | 1.116515  | 2.262078  |
| 6 | 46 | 0 | 1.184143  | -2.449378 | 1.412911  |
| 7 | 6  | 0 | -2.763515 | 1.817705  | 1.904247  |
| 8 | 8  | 0 | -3.626187 | 2.506538  | 1.554835  |

### IM12

Standard orientation:

| Center<br>Number | Atomic<br>Number | Atomic<br>Type | Coordinates (Angstroms) |           |           |
|------------------|------------------|----------------|-------------------------|-----------|-----------|
|                  |                  |                | X                       | Y         | Z         |
| 1                | 46               | 0              | 1.463936                | -0.788280 | 0.476330  |
| 2                | 46               | 0              | -1.457960               | -0.796864 | 0.479090  |
| 3                | 46               | 0              | -0.002894               | 0.360885  | -1.611184 |
| 4                | 8                | 0              | 0.004211                | -1.497836 | -0.703776 |
| 5                | 46               | 0              | -0.003814               | 1.484752  | 0.778160  |

### IM13

Standard orientation:

| Center<br>Number | Atomic<br>Number | Atomic<br>Type | Coordinates (Angstroms) |           |           |
|------------------|------------------|----------------|-------------------------|-----------|-----------|
|                  |                  |                | X                       | Y         | Z         |
| 1                | 46               | 0              | 0.494308                | -1.522334 | -0.787421 |
| 2                | 46               | 0              | -1.322414               | -0.000705 | 0.688351  |
| 3                | 46               | 0              | 0.493776                | 1.523053  | -0.786244 |
| 4                | 8                | 0              | 1.132470                | 0.001087  | -1.776285 |
| 5                | 46               | 0              | 1.265865                | -0.000288 | 1.292496  |
| 6                | 6                | 0              | -3.114418               | 0.000204  | -0.048931 |
| 7                | 8                | 0              | -4.152982               | 0.000337  | -0.528316 |

### TS<sub>13-14</sub>

Standard orientation:

| Center<br>Number | Atomic<br>Number | Atomic<br>Type | Coordinates (Angstroms) |           |           |
|------------------|------------------|----------------|-------------------------|-----------|-----------|
|                  |                  |                | X                       | Y         | Z         |
| 1                | 46               | 0              | 0.036270                | -1.591826 | -0.712387 |
| 2                | 46               | 0              | -0.877330               | 0.004093  | 1.357861  |
| 3                | 46               | 0              | 0.042307                | 1.590235  | -0.715732 |
| 4                | 8                | 0              | -0.917272               | 0.000669  | -1.510999 |
| 5                | 46               | 0              | 1.844278                | -0.002855 | 0.409710  |
| 6                | 6                | 0              | -2.280860               | 0.001572  | -0.060376 |

7            8            0            -3.383851      0.000190      -0.395564

---

### IM14

Standard orientation:

---

| Center<br>Number | Atomic<br>Number | Atomic<br>Type | Coordinates (Angstroms) |           |           |
|------------------|------------------|----------------|-------------------------|-----------|-----------|
|                  |                  |                | X                       | Y         | Z         |
| 1                | 46               | 0              | 0.671477                | -0.889325 | 1.326600  |
| 2                | 46               | 0              | -0.919571               | 0.708276  | -0.013444 |
| 3                | 46               | 0              | 0.662697                | -0.953429 | -1.282622 |
| 4                | 8                | 0              | -5.378176               | -0.458529 | -0.002633 |
| 5                | 46               | 0              | 1.660332                | 1.102021  | -0.031184 |
| 6                | 6                | 0              | -4.343567               | 0.062796  | 0.001378  |
| 7                | 8                | 0              | -3.295027               | 0.598057  | 0.005339  |

---

### IM15

Standard orientation:

---

| Center<br>Number | Atomic<br>Number | Atomic<br>Type | Coordinates (Angstroms) |           |           |
|------------------|------------------|----------------|-------------------------|-----------|-----------|
|                  |                  |                | X                       | Y         | Z         |
| 1                | 46               | 0              | 0.179639                | 1.416848  | -0.640409 |
| 2                | 46               | 0              | -0.179339               | -0.319658 | 1.637836  |
| 3                | 46               | 0              | -2.246767               | 0.321042  | -0.088250 |
| 4                | 46               | 0              | 2.089498                | -0.777387 | 0.027199  |
| 5                | 46               | 0              | -0.344036               | -1.875446 | -0.610777 |
| 6                | 8                | 0              | 2.064917                | 0.797834  | -1.078798 |
| 7                | 8                | 0              | -0.840900               | -0.128450 | -1.449999 |
| 8                | 6                | 0              | 0.757804                | 3.101917  | 0.125143  |
| 9                | 8                | 0              | 1.088414                | 4.103125  | 0.562749  |

---

### TS<sub>15-16</sub>

Standard orientation:

---

| Center<br>Number | Atomic<br>Number | Atomic<br>Type | Coordinates (Angstroms) |           |           |
|------------------|------------------|----------------|-------------------------|-----------|-----------|
|                  |                  |                | X                       | Y         | Z         |
| 1                | 46               | 0              | 0.215052                | 1.202275  | -0.789720 |
| 2                | 46               | 0              | -0.090843               | -0.230023 | 1.654508  |
| 3                | 46               | 0              | -2.288838               | 0.615965  | 0.147525  |
| 4                | 46               | 0              | 1.985752                | -0.924859 | 0.021624  |
| 5                | 46               | 0              | -0.606349               | -1.619931 | -0.695224 |
| 6                | 8                | 0              | 2.243902                | 0.793338  | -1.013482 |

---

|   |   |   |           |          |           |
|---|---|---|-----------|----------|-----------|
| 7 | 8 | 0 | -1.336899 | 0.086096 | -1.513719 |
| 8 | 6 | 0 | 1.654139  | 2.229418 | 0.019094  |
| 9 | 8 | 0 | 2.367439  | 2.948792 | 0.565279  |

### IM16

Standard orientation:

| Center<br>Number | Atomic<br>Number | Atomic<br>Type | Coordinates (Angstroms) |           |           |
|------------------|------------------|----------------|-------------------------|-----------|-----------|
|                  |                  |                | X                       | Y         | Z         |
| 1                | 46               | 0              | -0.121594               | -0.050726 | 0.217170  |
| 2                | 46               | 0              | 0.307570                | 0.195209  | 2.974331  |
| 3                | 46               | 0              | 2.520740                | 0.003045  | 1.338391  |
| 4                | 46               | 0              | -1.578876               | 1.619503  | 1.812499  |
| 5                | 46               | 0              | 0.980687                | 2.439991  | 1.636543  |
| 6                | 8                | 0              | -1.893271               | -1.455245 | 0.204534  |
| 7                | 8                | 0              | 1.409607                | 1.175077  | 0.106172  |
| 8                | 6                | 0              | -2.739720               | -2.104148 | -0.292668 |
| 9                | 8                | 0              | -3.583914               | -2.744744 | -0.759622 |

### IM17

Standard orientation:

| Center<br>Number | Atomic<br>Number | Atomic<br>Type | Coordinates (Angstroms) |           |           |
|------------------|------------------|----------------|-------------------------|-----------|-----------|
|                  |                  |                | X                       | Y         | Z         |
| 1                | 46               | 0              | -2.252431               | -0.004067 | 0.209209  |
| 2                | 46               | 0              | 0.038552                | -1.437866 | -0.792959 |
| 3                | 46               | 0              | 0.045281                | 1.467589  | -0.742729 |
| 4                | 46               | 0              | 0.134404                | -0.026300 | 1.570569  |
| 5                | 46               | 0              | 2.233057                | -0.004712 | 0.013396  |
| 6                | 8                | 0              | -1.143461               | 0.030792  | -1.480548 |

### IM18

Standard orientation:

| Center<br>Number | Atomic<br>Number | Atomic<br>Type | Coordinates (Angstroms) |           |           |
|------------------|------------------|----------------|-------------------------|-----------|-----------|
|                  |                  |                | X                       | Y         | Z         |
| 1                | 46               | 0              | -2.336850               | -0.443364 | -0.101914 |
| 2                | 46               | 0              | -0.358332               | 1.688209  | -0.360001 |
| 3                | 46               | 0              | 0.054522                | -0.376170 | 1.531620  |
| 4                | 46               | 0              | 0.185825                | -0.924341 | -1.324858 |

|   |    |   |           |           |           |
|---|----|---|-----------|-----------|-----------|
| 5 | 46 | 0 | 2.204454  | 0.483814  | -0.048934 |
| 6 | 8  | 0 | -1.564583 | 0.934031  | 1.103765  |
| 7 | 6  | 0 | 1.439391  | -1.350097 | 0.190814  |
| 8 | 8  | 0 | 1.924728  | -2.383311 | 0.501625  |

---

### TS<sub>18-19</sub>

Standard orientation:

---

| Center<br>Number | Atomic<br>Number | Atomic<br>Type | Coordinates (Angstroms) |           |           |
|------------------|------------------|----------------|-------------------------|-----------|-----------|
|                  |                  |                | X                       | Y         | Z         |
| 1                | 46               | 0              | 2.360714                | 0.369325  | -0.117258 |
| 2                | 46               | 0              | 0.362379                | -1.515614 | -0.654379 |
| 3                | 46               | 0              | -0.065373               | 0.018830  | 1.516529  |
| 4                | 46               | 0              | -0.242544               | 1.186122  | -1.117680 |
| 5                | 46               | 0              | -2.193340               | -0.529404 | -0.109938 |
| 6                | 8                | 0              | 1.863510                | -0.492822 | 1.548201  |
| 7                | 6                | 0              | -1.495868               | 1.283593  | 0.437148  |
| 8                | 8                | 0              | -2.017164               | 2.236893  | 0.899610  |

---

### IM19

Standard orientation:

---

| Center<br>Number | Atomic<br>Number | Atomic<br>Type | Coordinates (Angstroms) |           |           |
|------------------|------------------|----------------|-------------------------|-----------|-----------|
|                  |                  |                | X                       | Y         | Z         |
| 1                | 46               | 0              | 2.338674                | -0.126668 | 0.247184  |
| 2                | 46               | 0              | 0.247785                | 1.700769  | -0.130429 |
| 3                | 46               | 0              | 0.060769                | -0.797936 | -1.232516 |
| 4                | 46               | 0              | -0.275065               | -0.422062 | 1.567693  |
| 5                | 46               | 0              | -2.192239               | 0.423284  | -0.295262 |
| 6                | 8                | 0              | 2.026318                | -1.009078 | -1.458267 |
| 7                | 6                | 0              | -1.478106               | -1.363465 | 0.262292  |
| 8                | 8                | 0              | -1.952297               | -2.438298 | 0.360692  |

---

### TS<sub>19-20</sub>

Standard orientation:

---

| Center<br>Number | Atomic<br>Number | Atomic<br>Type | Coordinates (Angstroms) |           |           |
|------------------|------------------|----------------|-------------------------|-----------|-----------|
|                  |                  |                | X                       | Y         | Z         |
| 1                | 46               | 0              | -1.606227               | 1.233153  | -0.429552 |
| 2                | 46               | 0              | -0.423884               | -0.134872 | 1.603322  |
| 3                | 46               | 0              | -1.082186               | -1.653976 | -0.512954 |
| 4                | 46               | 0              | 1.116232                | 1.599485  | 0.116599  |
| 5                | 46               | 0              | 1.600479                | -1.131133 | 0.097812  |
| 6                | 8                | 0              | -0.612146               | -0.028932 | -1.612044 |
| 7                | 6                | 0              | 1.334368                | 0.259855  | -1.364245 |
| 8                | 8                | 0              | 1.885986                | 0.336267  | -2.397327 |

### IM20

Standard orientation:

| Center<br>Number | Atomic<br>Number | Atomic<br>Type | Coordinates (Angstroms) |           |           |
|------------------|------------------|----------------|-------------------------|-----------|-----------|
|                  |                  |                | X                       | Y         | Z         |
| 1                | 46               | 0              | -1.259134               | -0.000121 | 0.632671  |
| 2                | 46               | 0              | 1.254195                | 0.000001  | 1.360519  |
| 3                | 46               | 0              | 0.237904                | -1.928888 | -0.271433 |
| 4                | 46               | 0              | 0.237675                | 1.928904  | -0.271302 |
| 5                | 46               | 0              | 1.690887                | 0.000127  | -1.218211 |
| 6                | 8                | 0              | -3.593484               | -0.000168 | 0.230329  |
| 7                | 6                | 0              | -4.523045               | -0.000065 | -0.491825 |
| 8                | 8                | 0              | -5.443011               | 0.000080  | -1.196863 |

### IM21

Standard orientation:

| Center<br>Number | Atomic<br>Number | Atomic<br>Type | Coordinates (Angstroms) |           |           |
|------------------|------------------|----------------|-------------------------|-----------|-----------|
|                  |                  |                | X                       | Y         | Z         |
| 1                | 46               | 0              | -0.301320               | 1.544890  | 1.387643  |
| 2                | 46               | 0              | 1.622425                | 0.002602  | -0.000554 |
| 3                | 46               | 0              | -0.302192               | 1.544665  | -1.387691 |
| 4                | 8                | 0              | 1.130757                | -1.966463 | -0.000468 |
| 5                | 8                | 0              | 1.132871                | 1.971947  | -0.000549 |
| 6                | 46               | 0              | -0.299223               | -1.544378 | 1.391809  |
| 7                | 46               | 0              | -0.300133               | -1.544366 | -1.391685 |
| 8                | 46               | 0              | -2.101135               | -0.003069 | 0.000657  |
| 9                | 6                | 0              | 3.579332                | -0.002099 | -0.000201 |
| 10               | 8                | 0              | 4.720943                | -0.005881 | 0.000143  |



### TS<sub>21-22</sub>

Standard orientation:

| Center<br>Number | Atomic<br>Number | Atomic<br>Type | Coordinates (Angstroms) |           |           |
|------------------|------------------|----------------|-------------------------|-----------|-----------|
|                  |                  |                | X                       | Y         | Z         |
| 1                | 46               | 0              | 0.812305                | 1.197304  | 1.323191  |
| 2                | 46               | 0              | 1.181882                | -1.065538 | -0.242799 |
| 3                | 46               | 0              | 0.540129                | 1.381753  | -1.349815 |
| 4                | 8                | 0              | -0.355913               | -2.293880 | -0.187416 |
| 5                | 8                | 0              | 2.371929                | 0.608583  | -0.153856 |
| 6                | 46               | 0              | -1.053501               | -1.175925 | 1.416249  |
| 7                | 46               | 0              | -1.327600               | -0.966957 | -1.372011 |
| 8                | 46               | 0              | -1.662025               | 1.257121  | 0.261696  |
| 9                | 6                | 0              | 3.158118                | -1.016775 | -0.003629 |
| 10               | 8                | 0              | 4.291054                | -1.161726 | 0.134055  |

### IM22

Standard orientation:

| Center<br>Number | Atomic<br>Number | Atomic<br>Type | Coordinates (Angstroms) |           |           |
|------------------|------------------|----------------|-------------------------|-----------|-----------|
|                  |                  |                | X                       | Y         | Z         |
| 1                | 46               | 0              | -0.308555               | -1.250988 | 1.321647  |
| 2                | 46               | 0              | -1.420210               | 0.972514  | -0.004892 |
| 3                | 46               | 0              | -0.302096               | -1.254021 | -1.322188 |
| 4                | 8                | 0              | 0.122025                | 2.202136  | -0.003798 |
| 5                | 8                | 0              | -3.411433               | -0.193213 | -0.005598 |
| 6                | 46               | 0              | 1.093973                | 1.146543  | 1.410439  |
| 7                | 46               | 0              | 1.101559                | 1.142781  | -1.409017 |
| 8                | 46               | 0              | 2.004585                | -1.083509 | 0.005148  |
| 9                | 6                | 0              | -4.587018               | -0.109633 | -0.000975 |
| 10               | 8                | 0              | -5.743552               | -0.048296 | 0.003590  |

### IM23

Standard orientation:

| Center<br>Number | Atomic<br>Number | Atomic<br>Type | Coordinates (Angstroms) |           |           |
|------------------|------------------|----------------|-------------------------|-----------|-----------|
|                  |                  |                | X                       | Y         | Z         |
| 1                | 46               | 0              | 1.079742                | -1.195034 | -1.117170 |
| 2                | 46               | 0              | 1.098371                | 1.560716  | -0.457931 |
| 3                | 46               | 0              | 1.067389                | -0.388873 | 1.594795  |
| 4                | 8                | 0              | 2.246338                | -0.016881 | 0.013871  |

|   |    |   |           |           |           |
|---|----|---|-----------|-----------|-----------|
| 5 | 46 | 0 | -1.198447 | 0.365606  | -1.502553 |
| 6 | 46 | 0 | -1.210319 | 1.126069  | 1.049099  |
| 7 | 46 | 0 | -1.227404 | -1.465549 | 0.431347  |

### IM24

Standard orientation:

| Center<br>Number | Atomic<br>Number | Atomic<br>Type | Coordinates (Angstroms) |           |           |
|------------------|------------------|----------------|-------------------------|-----------|-----------|
|                  |                  |                | X                       | Y         | Z         |
| 1                | 46               | 0              | -1.172230               | 0.991773  | 1.420144  |
| 2                | 46               | 0              | 1.419845                | 1.241717  | -0.019179 |
| 3                | 46               | 0              | -1.182436               | 0.951450  | -1.437798 |
| 4                | 8                | 0              | -0.388675               | 2.135993  | -0.029086 |
| 5                | 46               | 0              | 0.722505                | -1.083083 | 1.344628  |
| 6                | 46               | 0              | 0.712718                | -1.119104 | -1.324115 |
| 7                | 46               | 0              | -1.565028               | -1.386278 | 0.022321  |
| 8                | 6                | 0              | 3.136024                | 0.403022  | -0.007261 |
| 9                | 8                | 0              | 4.158254                | -0.117989 | 0.000027  |

### TS<sub>24-25</sub>

Standard orientation:

| Center<br>Number | Atomic<br>Number | Atomic<br>Type | Coordinates (Angstroms) |           |           |
|------------------|------------------|----------------|-------------------------|-----------|-----------|
|                  |                  |                | X                       | Y         | Z         |
| 1                | 46               | 0              | 0.698631                | 0.238176  | -1.765954 |
| 2                | 46               | 0              | -1.543273               | -0.699317 | -0.523220 |
| 3                | 46               | 0              | -0.492895               | 1.789849  | 0.115607  |
| 4                | 8                | 0              | -2.405212               | 1.109909  | -0.462228 |
| 5                | 46               | 0              | 0.966424                | -1.807805 | -0.108112 |
| 6                | 46               | 0              | -0.032114               | -0.290811 | 1.813497  |
| 7                | 46               | 0              | 2.037091                | 0.687648  | 0.443891  |
| 8                | 6                | 0              | -3.383699               | -0.396924 | 0.103223  |
| 9                | 8                | 0              | -4.451735               | -0.339219 | 0.524477  |

### IM25

Standard orientation:

| Center<br>Number | Atomic<br>Number | Atomic<br>Type | Coordinates (Angstroms) |   |   |
|------------------|------------------|----------------|-------------------------|---|---|
|                  |                  |                | X                       | Y | Z |

|   |    |   |           |           |           |
|---|----|---|-----------|-----------|-----------|
| 1 | 46 | 0 | 0.582599  | 0.097472  | -1.890144 |
| 2 | 46 | 0 | -1.028763 | -1.335137 | -0.265257 |
| 3 | 46 | 0 | -1.025522 | 1.372174  | -0.131520 |
| 4 | 8  | 0 | -3.744441 | 1.152512  | 0.005881  |
| 5 | 46 | 0 | 1.615311  | -1.351741 | 0.129993  |
| 6 | 46 | 0 | 0.009370  | -0.095544 | 1.892715  |
| 7 | 46 | 0 | 1.621181  | 1.321850  | 0.271276  |
| 8 | 6  | 0 | -3.717459 | -0.018696 | -0.014971 |
| 9 | 8  | 0 | -3.668979 | -1.190666 | -0.035263 |

---

### 9. CO Oxidation Promoted by $Pd_6O_4^+$ clusters:

Similarly, like  $Pd_6O_2^+$  system,  $Pd_6O_4^+$  is formed by the straightforward association reaction:

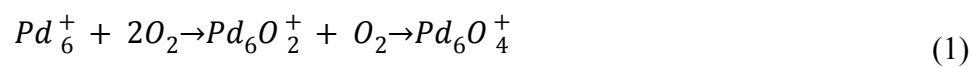

The PES depicted in Figure S2 represents the catalytic path of formation of  $Pd_6O_4^+$  from

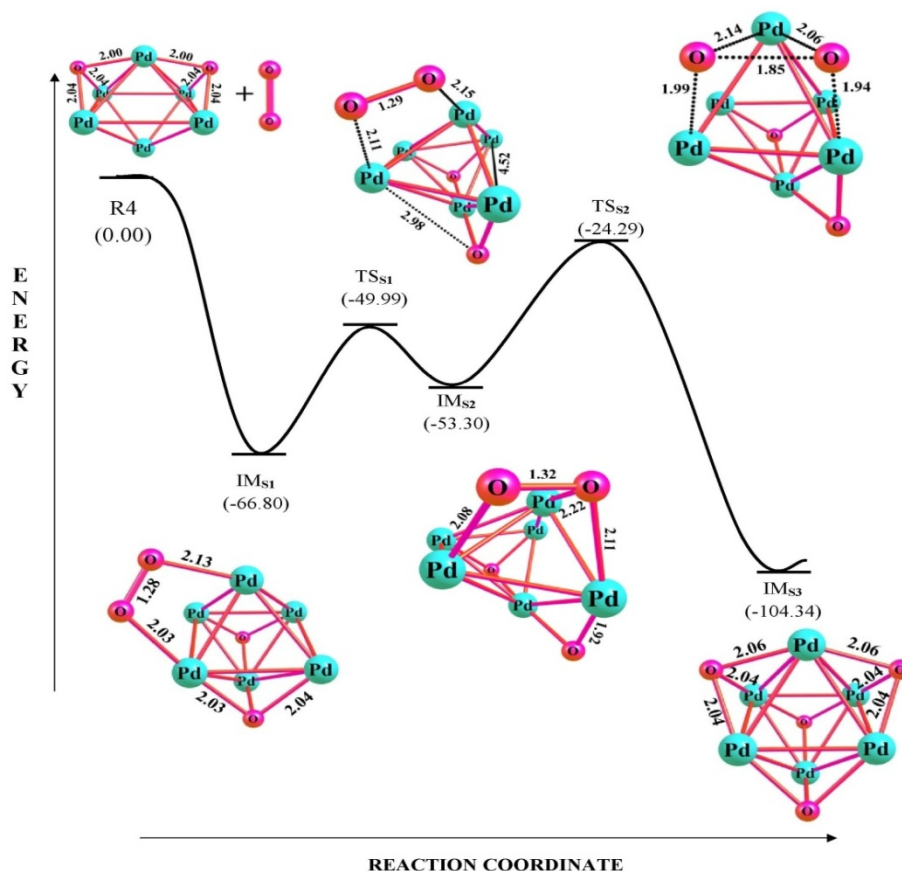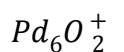

In the first step,  $O_2$  is adsorbed on the bridge site to form  $IM_{S1}$ . Before dissociation of  $O_2$ , there is structural rearrangement in  $IM_{S1}$  resulting  $IM_{S2}$  via  $TS_{S1}$  with activation barrier of 16.81 Kcal  $mol^{-1}$ . Structural fluxionality of the cluster favors the dissociation of  $O_2$  in the next step. IRC calculation of  $TS_{S2}$  signifies that the dissociation of  $O_2$  leads to the formation of  $IM_{S3}$ , where all the O atoms are at the hollow site. The energy barrier for  $TS_{S2}$  is 29.01 Kcal  $mol^{-1}$ .

According to the previous experimental study the catalytic activity of  $Pd_6O_4^+$  in CO oxidation in presence of oxygen is realized through the following stepwise reactions.

Figure S2. Potential energy profile (with ZPE corrected) for the dissociation of  $O_2$  on  $Pd_6O_2^+$  cluster in gas phase at M06-L/GENECP. All the energies are given in Kcal  $mol^{-1}$  in the parenthesis. All bond lengths and angles are in Å and ( $^\circ$ ) unit respectively.

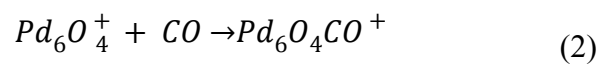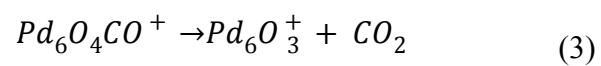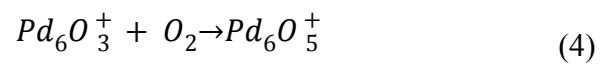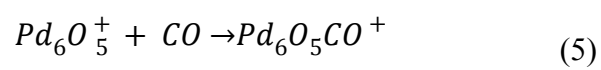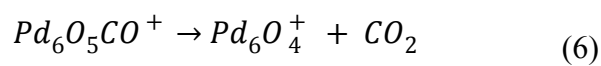

The PES is depicted in Figure S3.

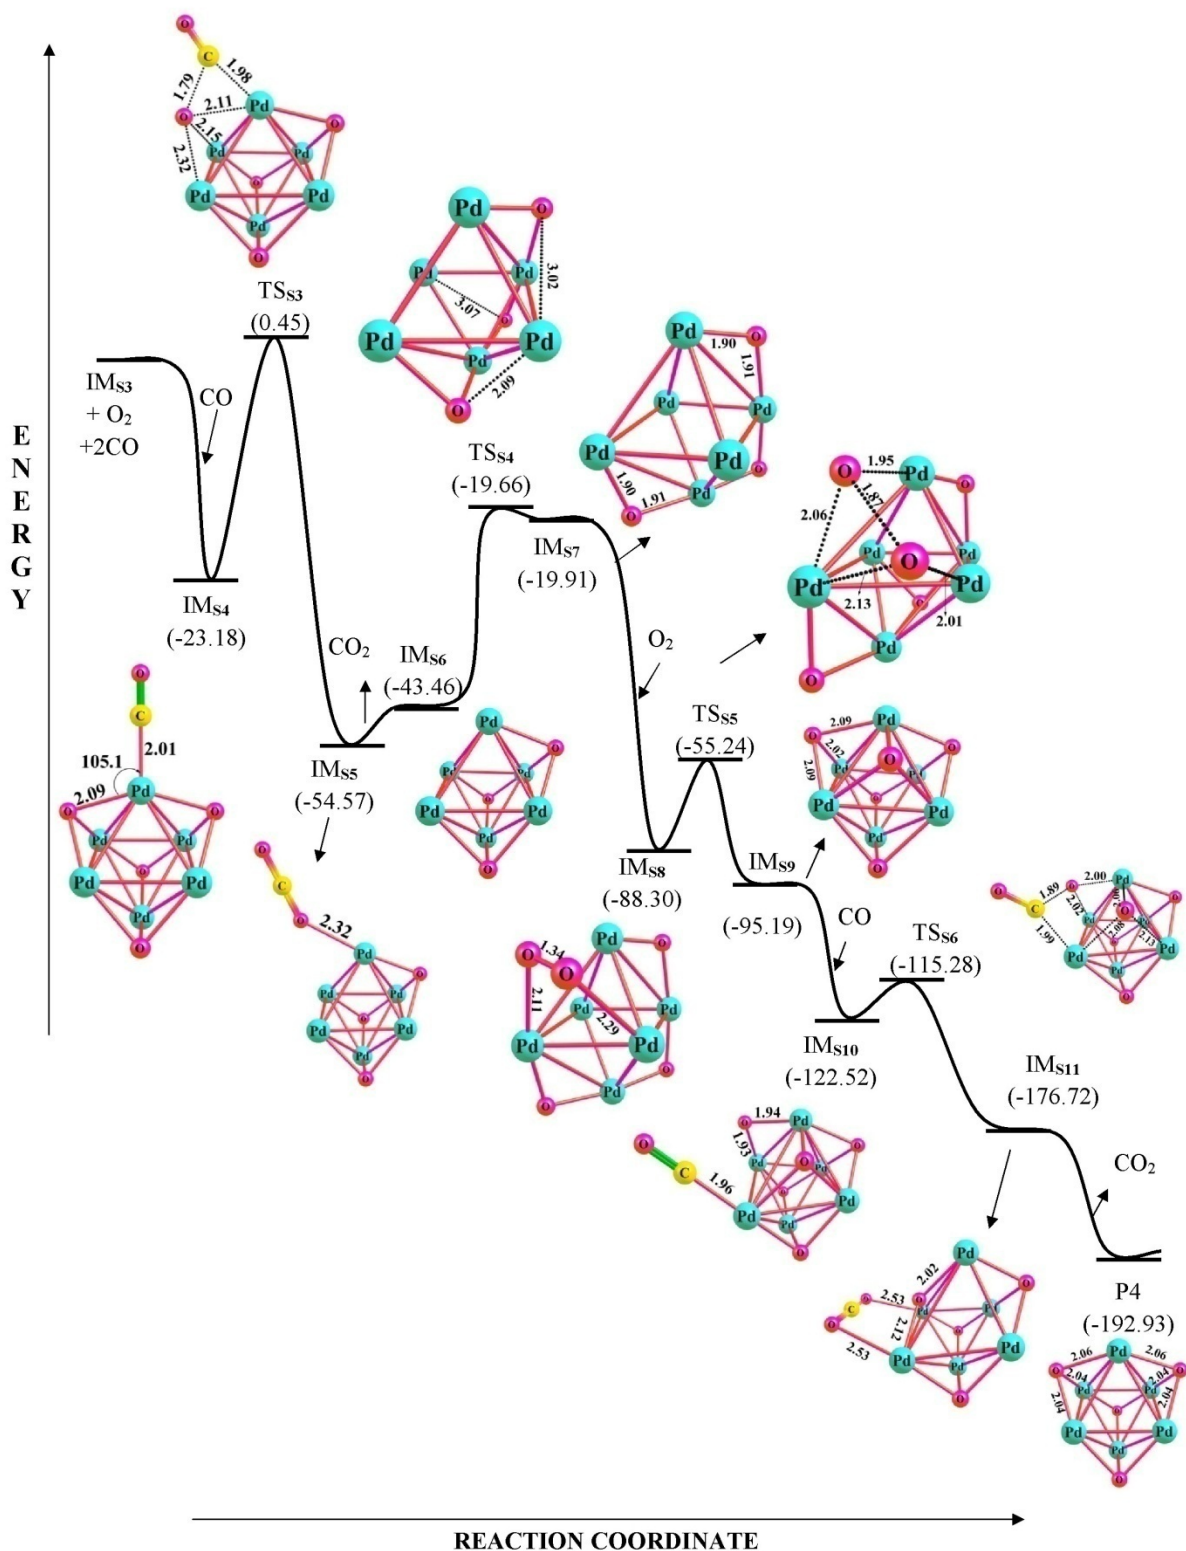

**Figure S3.** Potential energy profile (with ZPE corrected) for the oxidation of CO on oxide  $Pd_6O_4^+$  cluster in gas phase at M06-L/GENECP. All the energies are given in Kcal mol<sup>-1</sup> in the parenthesis. All bond lengths and angles are in Å and (°) unit respectively.

The first part of this mechanism passes through the barrier-free adsorption of CO at the top

position of the oxide cluster to form  $Pd_6O_4CO^+$  ( $IM_{S4}$ ,  $E_{ads}$  is 23.18 Kcal mol<sup>-1</sup>). The adsorbed CO reacts with the dissociated oxygen atom of  $Pd_6O_4^+$  to form CO<sub>2</sub> with activation barrier of 23.63 Kcal mol<sup>-1</sup>, whereas previously reported<sup>24</sup> activation barrier for CO oxidation on  $Pd_6O_4^+$  is 28.13 Kcal mol<sup>-1</sup>. IRC calculation confirms that TS<sub>S3</sub> is the perfect TS in between  $IM_{S4}$  and  $IM_{S5}$ . The elimination of the formed CO<sub>2</sub> molecule yields  $Pd_6O_3^+$  ( $IM_{S6}$ ). Before adsorption of O<sub>2</sub> on  $Pd_6O_3^+$ , the structural rearrangement occurs from  $IM_{S6}$  to  $IM_{S7}$  via TS<sub>S4</sub> (activation barrier is 23.80 Kcal mol<sup>-1</sup> which is higher than the previously reported<sup>24</sup> activation barrier of 17.52 Kcal mol<sup>-1</sup>. The positions of all the three O atoms change from hollow site to bridge site in  $IM_{S7}$ . Another barrier less adsorption of O<sub>2</sub> on  $IM_{S7}$  forms  $IM_{S8}$ . This adsorbed O<sub>2</sub> molecule is activated by dissociation through TS<sub>S5</sub> (barrier height 33.06 Kcal mol<sup>-1</sup>) to form intermediate,  $IM_{S9}$ , as per equation (4), where all the dissociated O atoms are in the hollow site. In the next step, CO molecule is adsorbed on  $Pd_6O_5^+$  to form  $Pd_6O_5CO^+$  ( $IM_{S10}$ ) intermediate with  $E_{ads}$  of 27.33 Kcal mol<sup>-1</sup>. It is interesting to note that in  $IM_{S10}$  one dissociated oxygen atom changes its position from hollow to bridge site. This oxygen atom at bridge site causes combustion of the adsorbed CO via TS<sub>S6</sub> (activation barrier 7.24 Kcal mol<sup>-1</sup> and previously reported<sup>24</sup> activation barrier is 18.67 Kcal mol<sup>-1</sup>) to form CO<sub>2</sub> intermediate product ( $IM_{S11}$ ). This catalytic cycle is closed by reformation of  $Pd_6O_4^+$  through desorption of CO<sub>2</sub>.

Table S7 Average bond lengths ( $\text{\AA}$ ) of the most stable clusters as a function of cluster size

| Average bond length ( $\text{\AA}$ ) |               |                             |
|--------------------------------------|---------------|-----------------------------|
| Cluster size                         | Present Study | Previous Study <sup>a</sup> |
| 4                                    | 2.61          | 2.64                        |
| 5                                    | 2.66          | 2.69                        |
| 6                                    | 2.68          | 2.71                        |

<sup>a</sup> Taken from Ref: 83

Table S8 Theoretical and experimental results of bond length R ( $\text{\AA}$ ), binding energy BE (eV) for Pd-O system.

| Species | R                         | BE                        |
|---------|---------------------------|---------------------------|
| Pd-O    | 1.82 (1.79 <sup>a</sup> ) | 2.63 (2.90 <sup>b</sup> ) |

Available theoretical and experimental values are given in the parenthesis.

<sup>a</sup> taken from Ref: 47

<sup>b</sup> taken from Ref: 73
